# Supplementary material for: IGFBP2 is a Potential Master-Regulator Driving Dysregulated Gene Network Responsible for Short Survival in Glioblastoma Multiforme
Source: Preprints.org preprint supplement (doi:10.20944/preprints202010.0046.v2), 2020-12-11
Supplement: Supplementary file 1 [file supplementary]

# IGFBP2 is a potential master-regulator driving dysregulated gene network responsible for short survival in Glioblastoma multiforme

Manasa KP, Darius Wlochowitz, Edgar Wingender, Tim Beißbarth, Alexander Kel

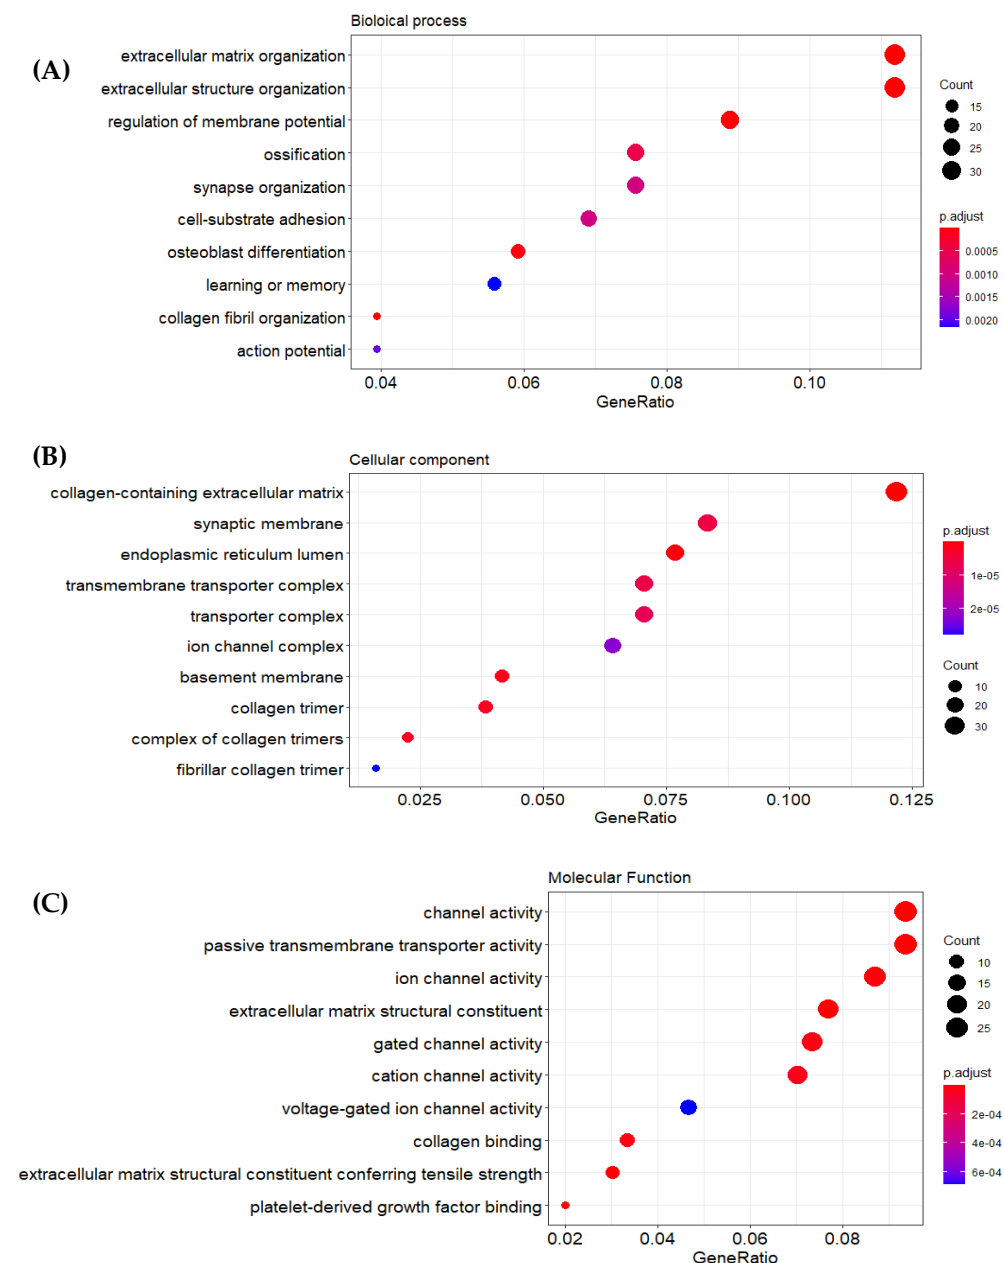

**Figure S1.** Functional enrichment analysis for differentially expressed genes abs (log-Fold change) of 0.5. (A) Dot plot for enriched GO Biological Process. Y-axis represents enriched ontology categories and X-axis represents GeneRatio, the percentage of all DEGs belonging to the corresponding category. The dots are sized based on gene ratio and are coloured according to their adjusted p-value. (B) Enrichment for GO Cellular Components similar to A (C) Enrichment for GO Molecular Function similar to A and B.

(A)

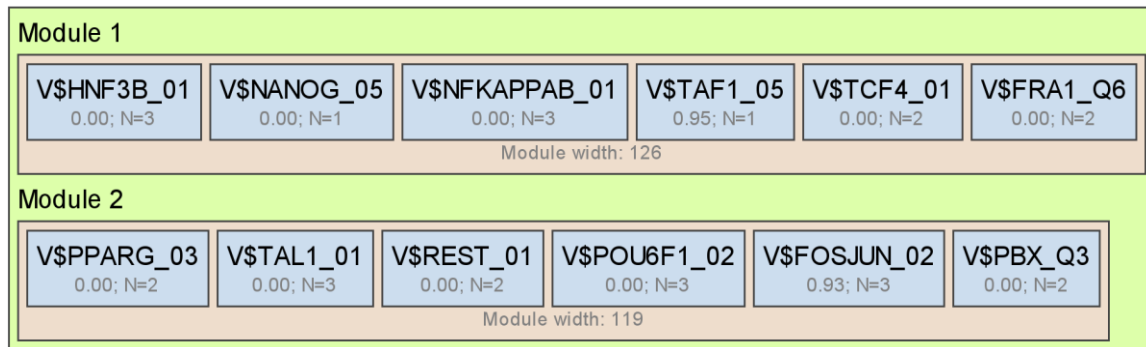

(B)

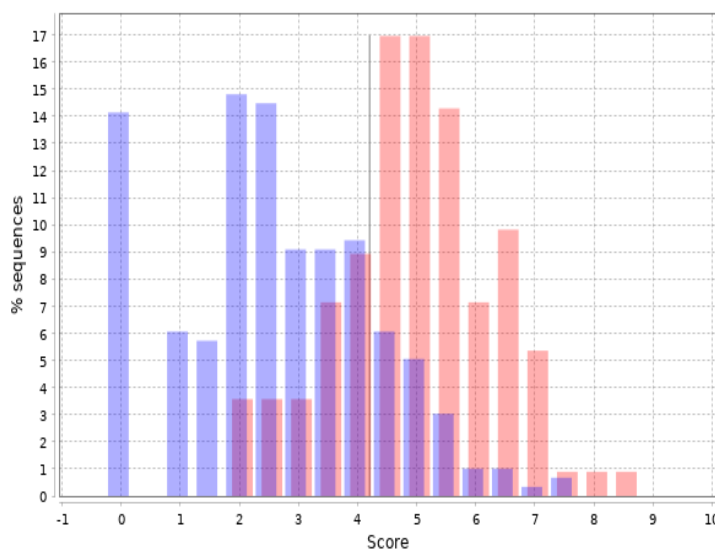

Model score ( $-p \cdot \log_{10}(pval)$ ): 14.01  
Wilcoxon p-value (pval):  $1.10e-28$   
Penalty (p): 0.501  
Average yes-set score: 4.92  
Average no-set score: 2.67  
AUC: 0.85  
Middle-point: 4.20  
False-positive: 17.51%  
False-negative: 24.11%

expected for a random set of  
**regulatory regions**

(C)

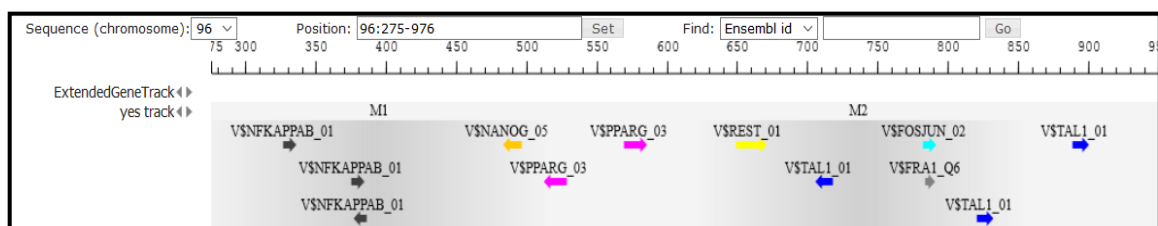

**Figure S2.** Results of CMA analysis of upregulated genes in short-term survivors. (A) Combination of 12 PWMs (Position weigh matrices) with their optimized cut-offs identified by genetic algorithm. (cut-off 0.00 means that the algorithm chose the default cut-off; parameter N represent maximal number of top scoring TF binding sites that are used in the module) (B) The discriminative parameters of the composition of the Composite Score (p-value of the Wilcoxon test, AUC, rates of false positives and false negatives) and two histograms of the distributions of the Composite Score values in Yes and No promoters. (C) An example of the site location in the promoter of CHI3L1 gene which is usually found upregulated in GBM. The promoter of the gene contains predicted sites for NFkappaB1, FRA1, NANOG and several other transcription factor

**Table S2.** Table of the transcription factors identified in CMA analysis of GSE dataset, LogFC (STS vs LTS), pvalue and adj\_pvalue in STS across 3 datasets GSE, TCGA-GBM microarray and GSE16011

| Transcription factors | GSE              |          |            | TCGA Dataset     |          |            | GSE16011         |          |            |
|-----------------------|------------------|----------|------------|------------------|----------|------------|------------------|----------|------------|
|                       | LogFC (ST vs LT) | pvalue   | adj_pvalue | LogFC (ST vs LT) | pvalue   | adj_pvalue | LogFC (ST vs LT) | pvalue   | adj_pvalue |
| FOSL1                 | 0.2353           | 0.00833  | 0.093832   | 0.022            | 0.866477 | 0.942691   | 0.461            | 0.032989 | 0.170584   |
| PBX3                  | 0.173            | 0.12895  | 0.372164   | 0.163            | 0.151272 | 0.411335   | 0.558            | 0.016908 | 0.113002   |
| NFKB1                 | 0.083            | 0.155435 | 0.408934   | -0.004           | 0.956529 | 0.982133   | 0.209            | 0.115989 | 0.355865   |
| PBX2                  | 0.082            | 0.102006 | 0.33059    | -0.22            | 0.001109 | 0.029677   | -0.278           | 0.019596 | 0.12327    |
| PPARG                 | 0.0699           | 0.222946 | 0.491011   | 0.129            | 0.375068 | 0.643568   | 0.463            | 3.60E-04 | 0.008414   |
| TAL1                  | 0.027            | 0.384873 | 0.647536   | -0.33            | 1.80E-05 | 0.003086   | 0.115            | 0.459738 | 0.692082   |
| REST                  | 0.021            | 0.578374 | 0.787431   | 0.176            | 0.028054 | 0.163735   | 0.288            | 0.034068 | 0.174094   |
| RELA                  | 0.007            | 0.90247  | 0.957246   | 0.072            | 0.281728 | 0.557129   | -0.142           | 0.304378 | 0.576816   |
| FOXA2                 | -0.05            | 0.336166 | 0.604469   | -0.199           | 0.015938 | 0.120938   | 0.166            | 0.322979 | 0.592225   |
| NANOG                 | -0.07            | 0.111174 | 0.344927   | -0.189           | 0.038579 | 0.196264   | -0.344           | 0.108064 | 0.344113   |
| PBX1                  | -0.102           | 0.166715 | 0.42262    | 0.06             | 0.564011 | 0.77815    | 0.029            | 0.887276 | 0.94975    |
| TCF7L2                | -0.12            | 0.147798 | 0.399134   | -0.084           | 0.406285 | 0.671782   | -0.531           | 0.00498  | 0.051104   |

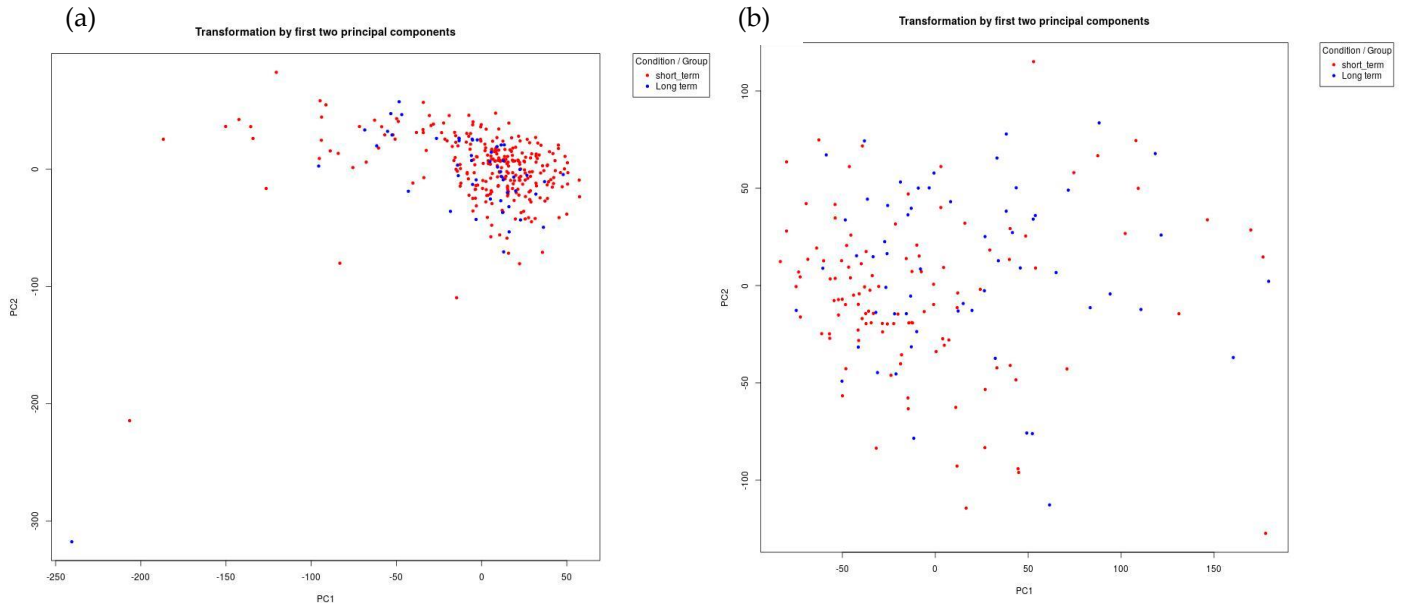

**Figure S3.** PCA plot for normalized (a) TCGA-GBM data (b) GSE (GSE108474, GSE53733) datasets shows no significant batch effects across survival groups colored as red (STS) and blue (LTS). Dataset has 258 STS and 49 LTS patients.

**Table S3.** 16 Transcription factors predicted from enhancer models, potentially regulating the genes upregulated in STS TCGA (LogFC > 0.5 and adj\_pvalue <0.05)

| Gene description                                                  | Gene symbol | Yes-No ratio | Regulatory score |
|-------------------------------------------------------------------|-------------|--------------|------------------|
| E2F transcription factor 1                                        | E2F1        | 1.249664     | 1.714286         |
| LYL1 basic helix-loop-helix family member                         | LYL1        | 1.165219     | 0                |
| nescient helix-loop-helix 2                                       | NHLH2       | 1.165219     | 0                |
| glial cells missing transcription factor 1                        | GCM1        | 1.294249     | 1.275613         |
| high mobility group AT-hook 1                                     | HMGA1       | 1.409148     | 1.295815         |
| heart and neural crest derivatives expressed 1                    | HAND1       | 1.295599     | 0                |
| nuclear receptor subfamily 3 group C member 1                     | NR3C1       | 1.388077     | 1.44531          |
| TAL bHLH transcription factor 1, erythroid differentiation factor | TAL1        | 1.648248     | 1.88456          |
| transcription factor 3                                            | TCF3        | 1.500366     | 1.703319         |
| HNF1 homeobox A                                                   | HNF1A       | 2.255652     | 1.043357         |
| HNF1 homeobox B                                                   | HNF1B       | 1.178953     | 0                |
| myeloid zinc finger 1                                             | MZF1        | 1.300681     | 0                |
| Kruppel like factor 4                                             | KLF4        | 1.289327     | 1.492063         |
| lymphoid enhancer binding factor 1                                | LEF1        | 2.299881     | 1.460317         |
| glial cells missing transcription factor 2                        | GCM2        | 1.294249     | 0                |
| high mobility group AT-hook 2                                     | HMGA2       | 1.409148     | 1.212121         |

**Table S4.** Table of the master regulators identified, their description, LogFC in STS and number of TFs regulated.

| Molecule Name                                    | logFC | CMA score | Reached from set |
|--------------------------------------------------|-------|-----------|------------------|
| FGFR3                                            | 1.073 | 12.142    | 10               |
| AEBP1                                            | 0.972 | 11.164    | 10               |
| IGFBP2                                           | 1.098 | 10.191    | 10               |
| CNR1                                             | 0.745 | 7.323     | 10               |
| TRIM22                                           | 0.638 | 11.303    | 10               |
| SPRY2                                            | 0.584 | 9.602     | 10               |
| CASP1                                            | 0.524 | 8.102     | 10               |
| DUSP6                                            | 0.705 | 8.742     | 10               |
| CXCL8,CXCR1,CXCR2,GNAI2                          | 1.050 | 10.031    | 10               |
| CD14,IRAK1,IRAK2,LBP,LY96,MYD88,TIRAP,TLR4       | 0.741 | 8.277     | 10               |
| IL1B,IL1R1,IL1RAP,IRAK1,IRAK2,IRAK4,MYD88,TOLLIP | 0.950 | 9.157     | 10               |
| PDGFA                                            | 0.825 | 7.948     | 10               |

**Table S5.** The analysis comparison table containing P-values, absolute differences, difference P-values and estimated FDR between transcription factor binding site prediction in TCGA and GSE datasets for FRA-1 transcription factor

| ID             | First P-value (-log) _TCGA | Second P-value (-log) _GSE | Difference | Difference P-value | Difference FDR |
|----------------|----------------------------|----------------------------|------------|--------------------|----------------|
| V\$FRA1_Q5     | 9.74787                    | 6.7487                     | 2.99917    | 0.04983            | 0.07587        |
| V\$FRA1_Q6     | 12.45412                   | 6.7487                     | 5.70542    | 0.00333            | 0.01445        |
| V\$FRA1_Q6_01  | 7.43289                    | 7.79674                    | 0.36385    | 0.695              | 0.74217        |
| V\$JUNBFRA1_01 | 13.06676                   | 14.10464                   | 1.03787    | 0.35421            | 0.41727        |

**Table S6.** GBM subtypes across survival groups and across 4 datasets used in this study

| GBM Subtype               | GSE108474 |     | GSE53733 |     | GSE16011 |     | TCGA_GBM |     |
|---------------------------|-----------|-----|----------|-----|----------|-----|----------|-----|
| Verhaak_2010<br>subtyping | STS       | LTS | STS      | LTS | STS      | LTS | STS      | LTS |
| Classical                 | 50        | 10  | 04       | 07  | 46       | 01  | 66       | 08  |
| Mesenchymal               | 17        | 04  | 08       | 04  | 18       | 02  | 84       | 12  |
| Proneural                 | 13        | 12  | 04       | 14  | 13       | 13  | 67       | 07  |
| Neural                    | 18        | 07  | 00       | 00  | 16       | 00  | 41       | 21  |
| Total                     | 98        | 33  | 16       | 25  | 93       | 16  | 258      | 48  |

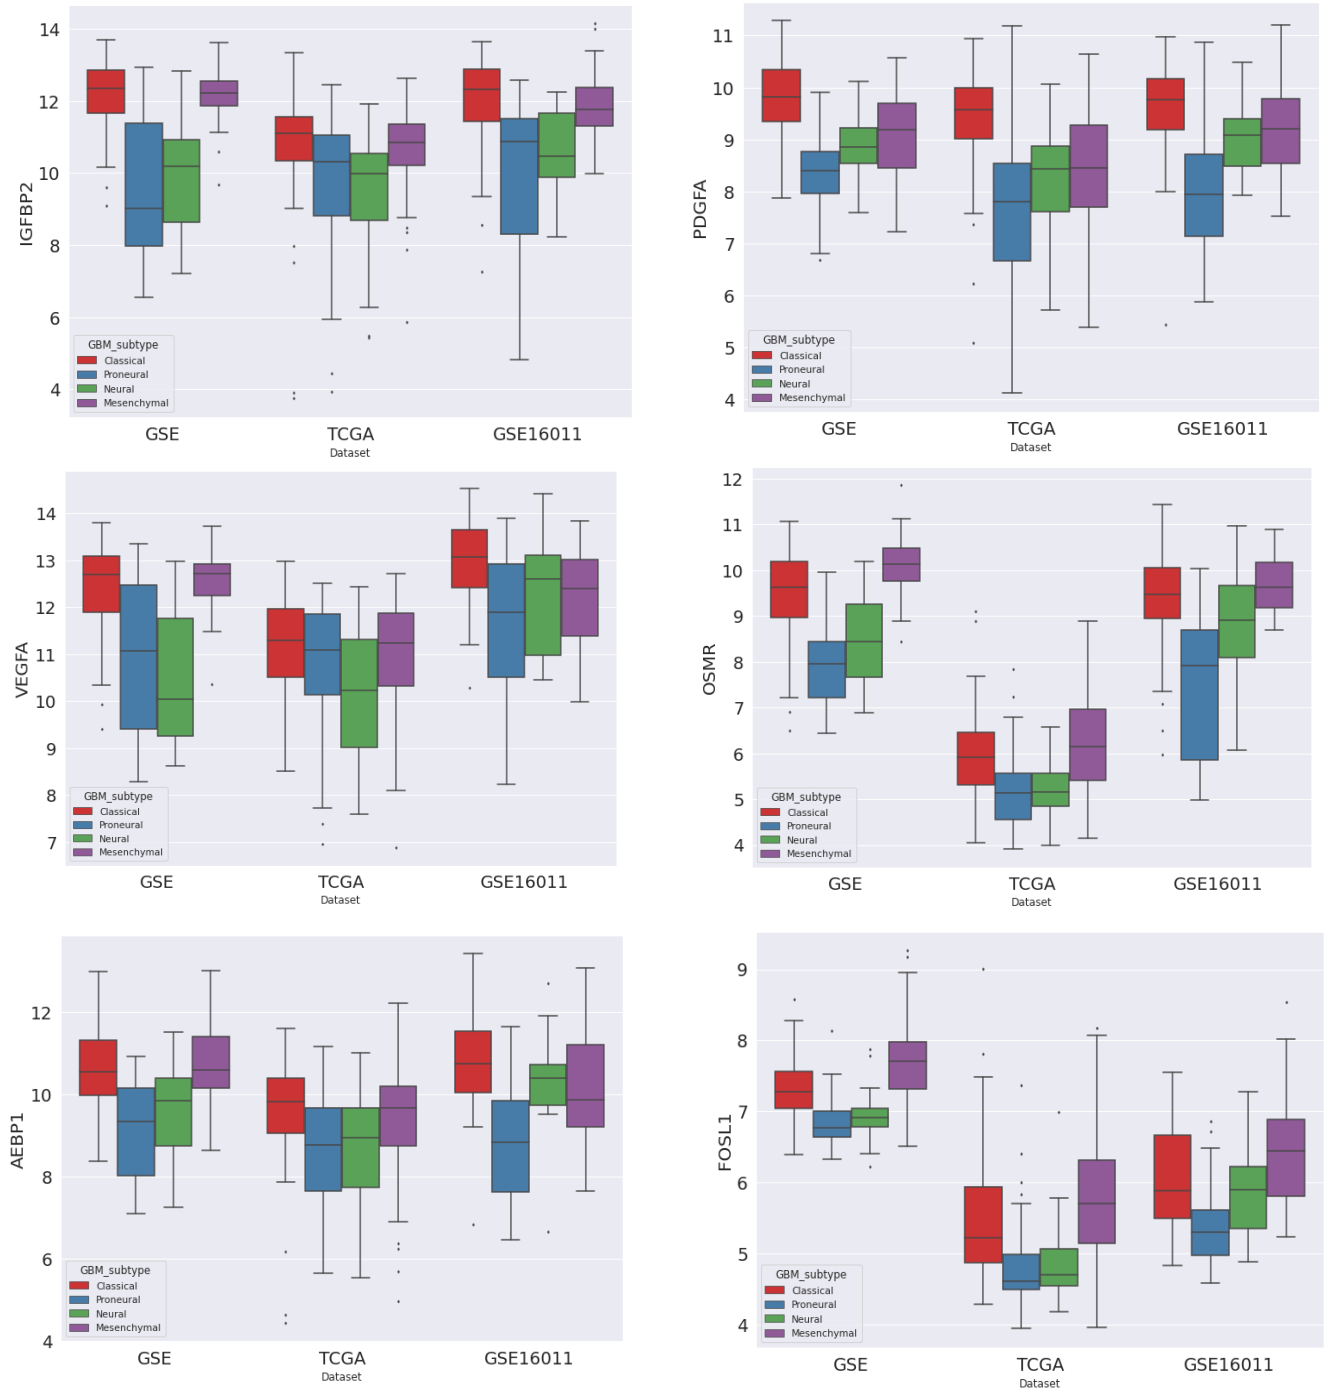

**Figure S4.** Expression levels of five master regulators and FRA-1 transcription factor across subtypes of GBM in GSE, TCGA and GSE16011 cohorts.
